# Supplementary material
Source: publisher figshare collection journal article supplement (https://karger.figshare.com/ndownloader/files/5958759)
Supplement: Supplementary file 1 [file 5958759]

**Table S1. Demographic distribution of participants.**

| Demographic variable            | Participant response | Total |
|---------------------------------|----------------------|-------|
| Gender                          | Female               | 2098  |
|                                 | Male                 | 1273  |
| Age                             | 16-24.9              | 491   |
|                                 | 25-34.9              | 1689  |
|                                 | ≥35                  | 1154  |
|                                 | Unspecified          | 37    |
| Marital status                  | Married              | 3234  |
|                                 | Divorced             | 1     |
|                                 | Separated            | 10    |
|                                 | Single               | 126   |
| Education level                 | None/Primary         | 1104  |
|                                 | Secondary            | 1744  |
|                                 | Tertiary             | 493   |
|                                 | Unspecified          | 30    |
| Employment                      | Full-time            | 1500  |
|                                 | Part-time            | 815   |
|                                 | Unemployed           | 992   |
|                                 | Unspecified          | 64    |
| Household size                  | ≤2                   | 515   |
|                                 | 3-6                  | 2342  |
|                                 | ≥7                   | 476   |
|                                 | Unspecified          | 38    |
| Distance to healthcare facility | 0-5km                | 1194  |
|                                 | >5-10km              | 1240  |
|                                 | >10-15km             | 578   |
|                                 | >15km                | 316   |
|                                 | Unspecified          | 43    |
| Area                            | Rural                | 2454  |
|                                 | Urban                | 886   |
|                                 | Unspecified          | 31    |

**Table S2. Lab-determined sickle cell genotype vs. self-reported status of female participants.**

| Genotype | Self-reported status |     |    |       | No self-report | Total |
|----------|----------------------|-----|----|-------|----------------|-------|
|          | AA                   | AS  | SS | Other |                |       |
| AA       | 1032                 | 101 | 1  | 4     | 508            | 1646  |
| AS       | 154                  | 152 | 1  | 1     | 142            | 450   |
| SS       | 1                    | 0   | 0  | 0     | 0              | 1     |
| AC       | 0                    | 0   | 0  | 0     | 1              | 1     |
| Total    | 1187                 | 253 | 2  | 5     | 651            | 2098  |

Participant genotype was determined by cellulose acetate electrophoresis on hemolysate from venous blood samples. Shaded cells contain individuals who self-reported their sickle cell status correctly.

**Table S3. Lab-determined sickle cell genotype vs. self-reported status of male participants.**

| Genotype | Self-reported status |     |    |       | No self-report | Total |
|----------|----------------------|-----|----|-------|----------------|-------|
|          | AA                   | AS  | SS | Other |                |       |
| AA       | 433                  | 42  | 1  | 0     | 495            | 971   |
| AS       | 81                   | 80  | 1  | 0     | 134            | 296   |
| SS       | 2                    | 0   | 0  | 0     | 1              | 3     |
| AC       | 1                    | 0   | 0  | 0     | 2              | 3     |
| Total    | 517                  | 122 | 2  | 0     | 632            | 1273  |

Participant genotype was determined by cellulose acetate electrophoresis on hemolysate from venous blood samples. Shaded cells contain individuals who self-reported their sickle cell status correctly.

**Table S4. Observed vs. expected genotypes.**

| Genotype | Observed | Expected |
|----------|----------|----------|
| AA       | 2617     | 2656     |
| AS       | 746      | 669.2    |
| AC       | 4        | 3.55     |
| SS       | 4        | 42.2     |
| SC       | 0        | 0.447    |
| CC       | 0        | 0.001    |

The log-likelihood ratio full-enumeration exact test ("HWxtest" package in R, version 3.3.1) was used to determine if there was a significant difference ( $P < 0.05$ ) between the number of observed SS individuals and the number of SS individuals expected, assuming Hardy-Weinberg Equilibrium.
